# Supplementary material
Source: MDPI journal article supplement (https://www.mdpi.com/2313-433X/7/4/66)
Supplement: s1 [file s1]

# Supplementary Materials: Transfer Learning in Magnetic Resonance Brain Imaging: a Systematic Review

Juan Miguel Valverde<sup>1</sup>, Vanda Imani<sup>1,†</sup>, Ali Abdollahzadeh<sup>1,†</sup>, Riccardo De Feo<sup>1,†</sup>, Mithilesh Prakash<sup>1,†</sup>, Robert Cizek<sup>1,†</sup> and Jussi Tohka<sup>1,\*</sup>

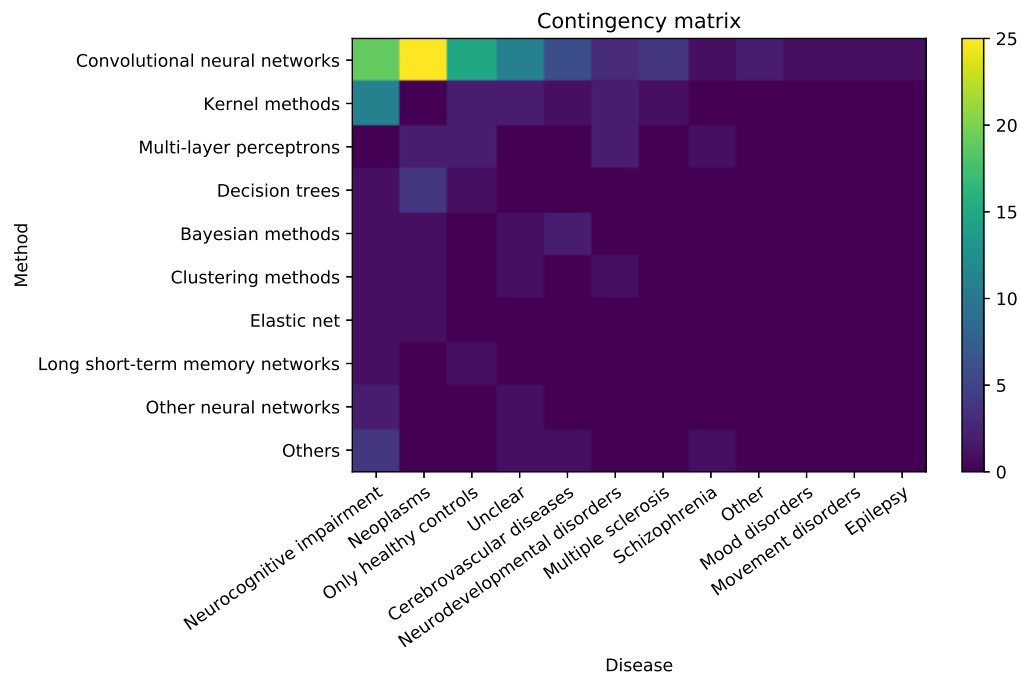

**Figure S1.** Contingency matrix between the machine learning methods and the brain disease categories where the methods have been applied to. Each element  $(i, j)$  of the matrix indicates the number of articles that applied machine learning method  $i$  to answer a question related to the brain disease  $j$  (or healthy controls).
